# Supplementary material
Source: publisher figshare collection journal article supplement (https://frontiersin.figshare.com/ndownloader/files/25591772)
Supplement: Supplementary file [file 25591772]

## Supplementary Material

### 1 Supplementary Figures

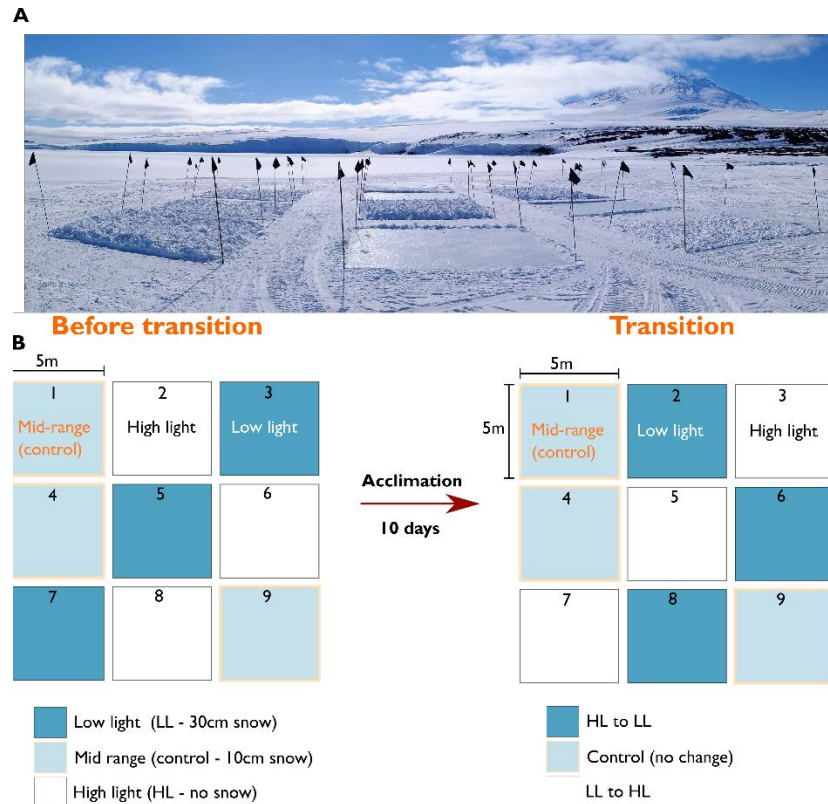

Figure S1: **A**) Photograph of the nine 5 m x 5 m treatments before the change in irradiance. **B**) schematic representation of the random allocation of snow treatments. Plots ("before transition") were acclimated to the respective irradiance level for 10 days before snow was removed or added ("transitioned") to alter the under-ice irradiance.

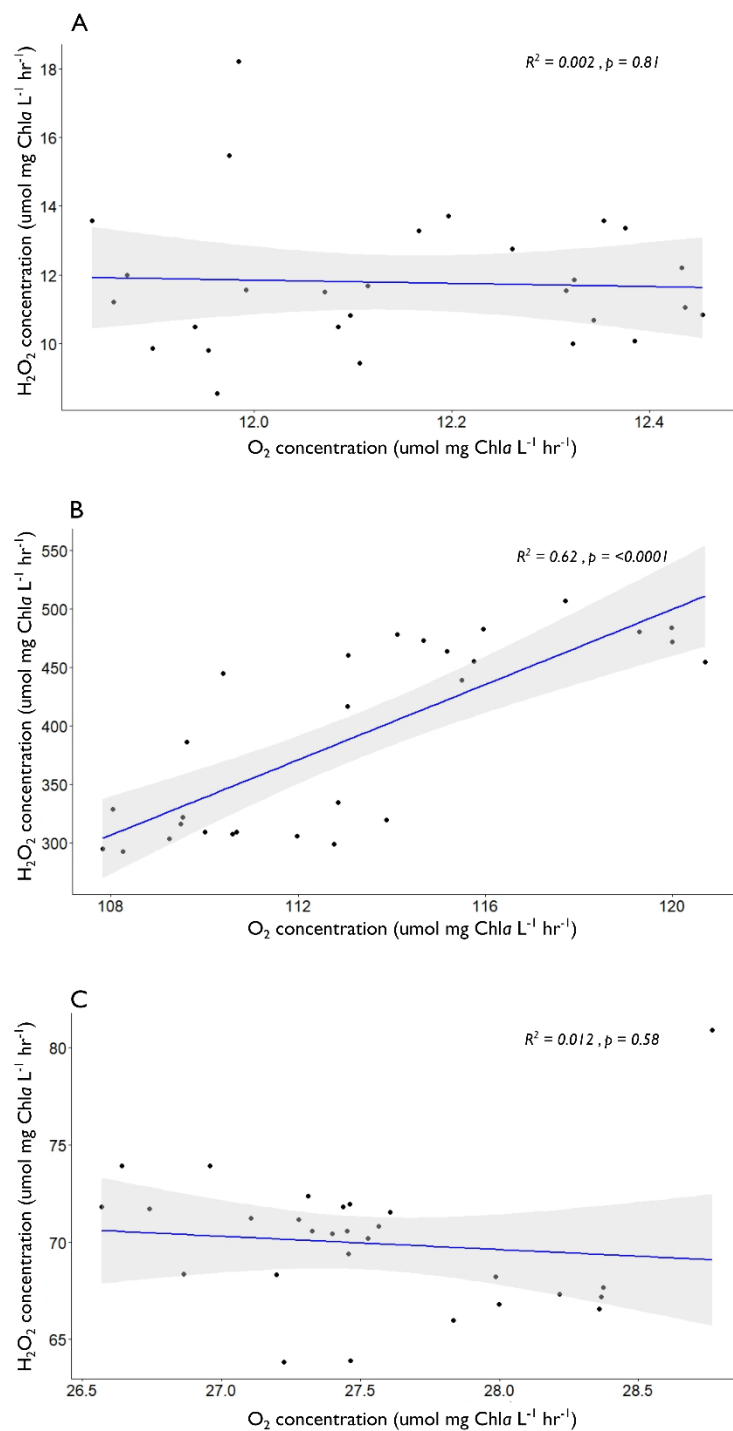

Figure S2: Pearson correlations in LL – HL treatments between  $\text{H}_2\text{O}_2$  concentration ( $\mu\text{mol mg Chla L}^{-1} \text{hr}^{-1}$ ) and  $\text{O}_2$  concentration ( $\mu\text{mol mg Chla L}^{-1} \text{hr}^{-1}$ ) over time. The final 60 seconds of each electrochemical trace ( $n = 3$ ) was used for this analysis. Means of the traces were used to determine

the significance of correlations. **A)** before the transition (at LL treatment for 10 days before removal). **B)** 24 hours following the removal of snow loading and, **C)** 72 hours following transition.

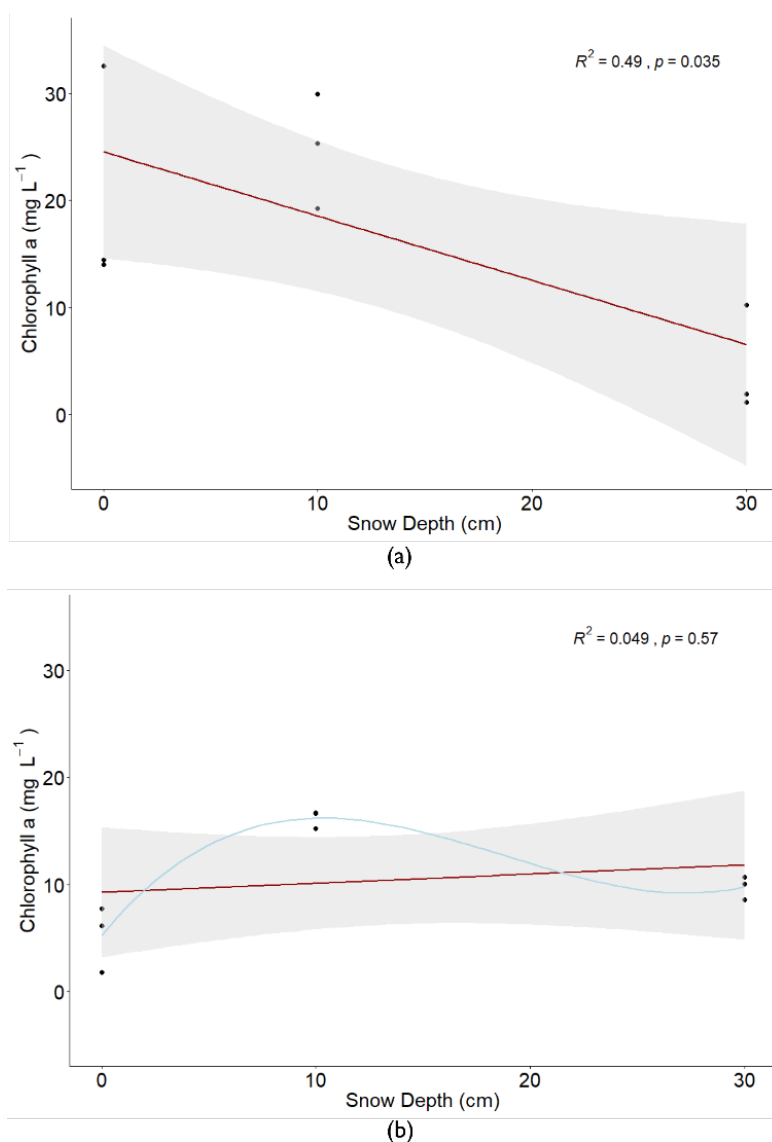

Figure S3. Correlation between chlorophyll a and snow thickness, **a)** before the transition (at snow thickness for 10 days before removal) and **b)** 72 hours after the reversal in the snow (either added or removed).
